# Supplementary material
Source: Research Square preprint supplement (doi:10.21203/rs.3.rs-8704772/v1)
Supplement: Supplementary file 1 [file 6de3f5a37229363176f30a42.docx]

Feedback Study:

Guide for Audio Diaries

**Introduction**

How we describe our experiences – telling our story – can be useful to understand the impact of these experiences on us and on our development. Audio diaries are a relatively new way to research student experience in the clinical environment and how this impacts their learning.

In this study we would like you to record a diary entry of your feedback experiences on the wards and clinics more or less “as they happen”, that is on the same day, if you can. The feedback relating to your clinical learning is of particular importance and is usually given verbally. We are hoping that you can submit one entry every 1 – 2 weeks. The advantage of using audio diaries in this way is that you are more likely to remember aspects that are relevant or important when recorded close to the event – if we interviewed you or had a focus group each month, you may have difficulty recalling a lot of what happened, why and how you felt.

The diaries may only take a few minutes, although if you feel the need to talk for longer, that would be welcome. Once you have recorded the diary entry, it should then be submitted. As far as humanly possible, Paul Fullerton will listen to the recording and acknowledge receiving it. We are anticipating this phase to last about three months.

(If you prefer you may submit a written diary).

**What should you record?**

With each “diary” record we would like you to:

- briefly describe the situation in which the feedback was given.
- what was the feedback given, and how?
- what did you think about what was said? (e.g. unfair, fair comment, bland, valuable?)
- how did it make you feel, as a person?
- do you feel you are going to be able to use it in learning and developing your skills?
- have any of your fellow students / group-mates commented on the feedback **you** received?
- *Do you have any reflections on feedback you have seen being given to others? How did this make you feel?*

**How to record and submit the diary**

- Probably the easiest way to record is by using your Smart handphone.
- Both Android and iOS devices usually come with recording apps. If your device does not have such an App, there are a number available at no cost on the relevant “store”
- If you use one of these apps the recording can be sent by email to Paul Fullerton
- Alternatively, you can record using WhatsApp and send it to Paul Fullerton
- The recordings will be transferred as soon as possible to LabArchives for secure storage, prior to transcription, and will be kept securely for 5 years.
