# Supplementary material
Source: Research Square preprint supplement (doi:10.21203/rs.3.rs-8704772/v1)
Supplement: Supplementary file 2 [file b64bb92685d2c26529c0bff7.docx]

Feedback Study:

Student Group Interview Discussion Guide

**Introduction**:

I would like to welcome you today and thank you for agreeing to participate in this study which aims to look at how you seek feedback, how it is provided and then used to support your learning in the clinical environment. The desired result of the study is to improve the way medical students in Monash Malaysia (and perhaps more widely) get and use feedback.

I will summarise the study explanatory statement and ensure that you understand what is involved in participating. You may withdraw your consent and leave the discussion at any stage. No-one will be specifically identified in these discussions. Following this focus group, the discussions will be transcribed and anonymized. The recordings will be stored securely on LabArchives, a secure repository for research data, provided by Monash University. De-identified transcripts will be stored in another area of this repository and both recordings and transcripts will be securely destroyed, five years after finalisation of the study.

## **Ground rules**

Before we begin, it is a good idea that we set some ground rules.

- We expect that you will respect confidentiality and will refrain from discussing what has been said outside the focus group setting
- Only one person speaks at a time (this is important as we may lose valuable data)
- You do not have to speak in any particular order
- When you do have something to say, please do so. It is important to hear each of your views
- There are no right or wrong answers; everyone’s experiences and perspectives are valid
- You may or may not agree with the views of other people in the group. However, we wish to encourage only *respectful* differences of opinion
- Everything that you say in this room will be kept anonymous and, while we will be reporting the findings in general, personal confidentiality will be maintained

Do you have any further questions for me at this stage?

I will now commence recording the discussion.

1. Let’s start off by discussing how ***you*** would describe feedback. I’m interested in what you feel are the important features of feedback, what is good feedback, and if you can give me examples of what you feel is ***not feedback***?
2. Is it important for the tutor to ‘signpost’ feedback – “I am about to give you feedback” so you can recognise that you are being given feedback?
3. Do you think you need to ***ask*** for feedback, or should it be given without being requested? Would this alter the way you would receive or accept feedback, or more importantly use the feedback?
4. Do you see advantages, or disadvantages, of receiving feedback in a group, or individually? What about verbal, F2F feedback compared to written feedback?

Have your experiences influenced this? When is one better than the other?

1. How much do you think your “Culture” or your experiences growing up have influenced your view on this?
2. The term “***scolding***” is a familiar term in Malaysian hospitals. I am interested in your perspective and experience with this. … What leads you to feel this way? Newspapers attribute house officer suicide to bullying and scolding. I have heard or read comments like the following and am interested in your feelings about these:
   - 1. Scolding is essential to trainee learning - If tutors do not “scold” trainees / students, they will not learn.
     2. Students expect to be punished if they are wrong, so are not worried by scolding or punishment.
     3. Students / house officers need to toughen up - if suicide occurs, they weren’t suitable to be doctors.
     4. How much scolding type feedback have you received or observed?
3. How important are **marks or grades** to you as feedback? Do you need more? Are there differences how you view feedback when it relates to assessment?
4. Does it matter who the feedback comes from, whether you take notice of it or not?
   - 1. Nurse, Medical assistant? Fellow student? Junior Doctor – House officer, Intern, Junior MO? More senior (Specialist, Consultant)
     2. What about patients or family members?
     3. Have you had the opportunity (or were asked to observe) a colleague doing something e.g. taking history, performing an examination, and then you feedback? Then the supervisor critiques. How do you see that as a learning opportunity?
5. I am sure you have had feedback from different people that seems to contradict the feedback from someone else. How do you cope when feedback given by different people seems to be in conflict?
6. Think about feedback you have been given recently: do you feel it was useful?
   1. What “defines” whether feedback is useful? How can you make it useful?
   2. How do you **usually** receive feedback? How often?
   3. Do you feel you usually ***understand*** what is meant by the feedback given?
   4. Are you prepared to ask your tutor what was meant by that feedback?

Why do you think that?

1. What do you think about giving feedback ***to*** your tutor? How might you do it?
